# Supplementary material for: Synthesis and magnetic properties of crystalline mesoporous CoFe2O4with large specific surface area
Source: Royal Society of Chemistry journal article supplement (doi:10.1039/b919090b), 2009-12-09
Supplement: b919090b.pdf [file b919090b.pdf]

## Electronic Supplementary Information (ESI):

### Synthesis and Magnetic Properties of Crystalline Mesoporous

### CoFe<sub>2</sub>O<sub>4</sub> with Large Specific Surface Area

Yanyan Sun<sup>a</sup>, Guangbin Ji\*<sup>a</sup>, Mingbo Zheng<sup>a</sup>, Xiaofeng Chang<sup>a</sup>, Shandong Li<sup>b</sup>, Yu Zhang<sup>c</sup>

<sup>a</sup> College of Material Science and Technology, Nanjing University of Aeronautics and

Astronautics, Nanjing 210016, P. R. China. Fax: +86-25-5211-2900; Tel: +86-25-5211-2905;

E-mail: gbj@nuaa.edu.cn

<sup>b</sup> Department of Physics, Fujian Normal University, Fuzhou 350007, P. R. China.

Fax: +86-591-8348-6160; Tel: +86-591-2819-895

<sup>c</sup> State Key Lab Bioelect, Southeast University, Nanjing 210096, P. R. China. Fax: +86-25-

8379-2576; Tel: +86-25- 8379-2576

## Figures:

**Figure S1.** The wide-angle XRD patterns of the samples prepared by one-time impregnation (a)

CoFe<sub>2</sub>O<sub>4</sub>-SBA-1; (b) CoFe<sub>2</sub>O<sub>4</sub>-KIT-1; (c) CoFe<sub>2</sub>O<sub>4</sub>-standard line-graph (22-1086)

**Figure S2.** The low-angle XRD patterns of (a) SBA-15; (b) KIT-6

**Figure S3.** Nitrogen adsorption-desorption isotherms measured at 78K: (a) SBA-15; (b) KIT-6

**Figure S4.** TEM images of (a) CoFe<sub>2</sub>O<sub>4</sub>-SBA-2; (b) CoFe<sub>2</sub>O<sub>4</sub>-KIT-2; (c) CoFe<sub>2</sub>O<sub>4</sub>-SBA-1; (d)

CoFe<sub>2</sub>O<sub>4</sub>-KIT-1. “1” and “2” stand for the number of impregnation times.

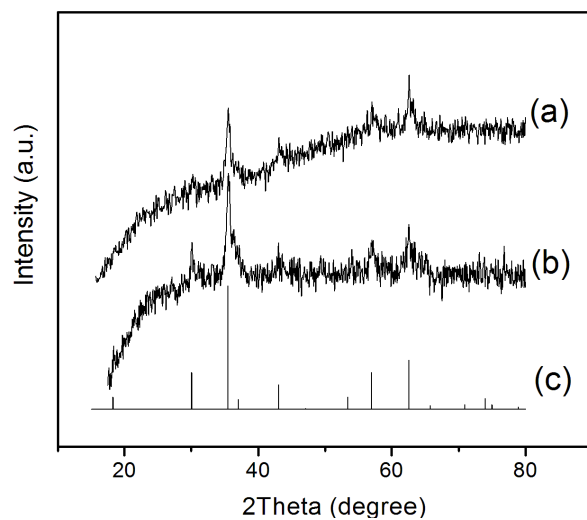

**Figure S1.** The wide-angle XRD patterns of the samples prepared by one-time impregnation (a) CoFe<sub>2</sub>O<sub>4</sub>-SBA-1; (b) CoFe<sub>2</sub>O<sub>4</sub>-KIT-1; (c) CoFe<sub>2</sub>O<sub>4</sub>-standard line-graph (22-1086)

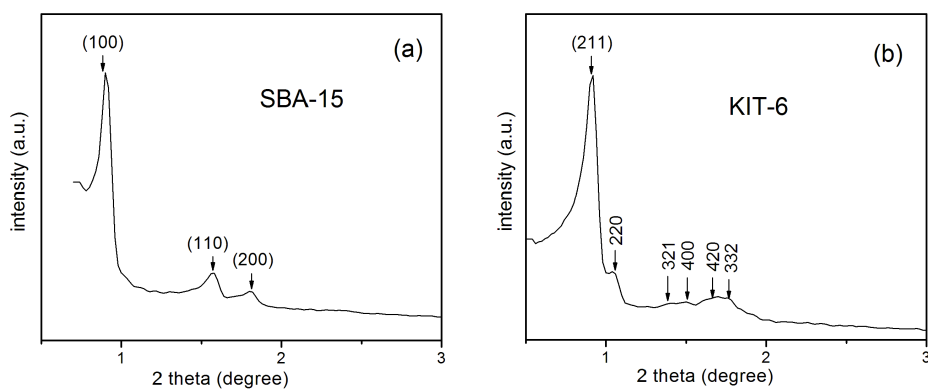

**Figure S2.** The low-angle XRD patterns of (a) SBA-15; (b) KIT-6

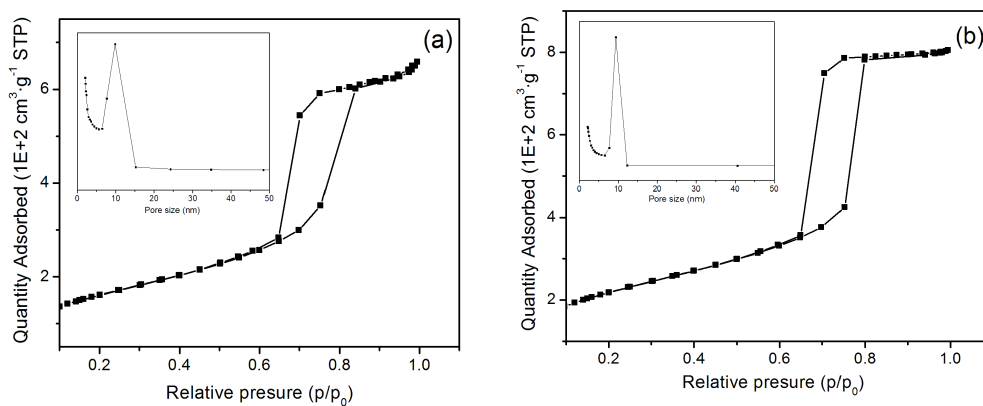

**Figure S3.** Nitrogen adsorption-desorption isotherms measured at 78K: (a) SBA-15; (b) KIT-6

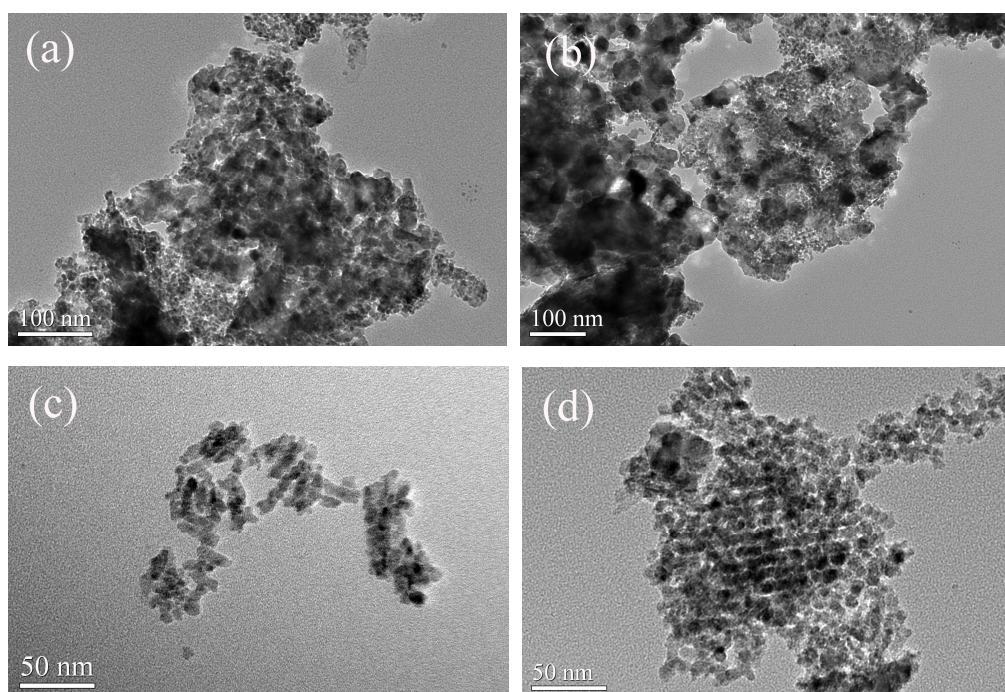

**Figure S4.** TEM images of (a)  $\text{CoFe}_2\text{O}_4$ -SBA-2; (b)  $\text{CoFe}_2\text{O}_4$ -KIT-2; (c)  $\text{CoFe}_2\text{O}_4$ -SBA-1; (d)  $\text{CoFe}_2\text{O}_4$ -KIT-1. “1” and “2” stand for the number of impregnation times.
